# Supplementary material for: An Advanced Decision Support Platform in Energy Management to Increase Energy Efficiency for Small and Medium Enterprises
Source: Preprints.org preprint supplement (doi:10.20944/preprints202004.0485.v1), 2020-04-28
Supplement: Supplementary file 1 [file Daily Energy Consumptions-2019.xlsx]

## Sheet: Energy Consumptions - 2019
Year	Month	Day from month	Day from week	Energy consumption [kWh]
2019	1	1	2	0
2019	1	2	3	0
2019	1	3	4	50
2019	1	4	5	77.4
2019	1	5	6	0
2019	1	6	7	0
2019	1	7	1	67.2
2019	1	8	2	70.3
2019	1	9	3	68.5
2019	1	10	4	91.2
2019	1	11	5	77
2019	1	12	6	0
2019	1	13	7	0
2019	1	14	1	89.5
2019	1	15	2	42.9
2019	1	16	3	68.9
2019	1	17	4	80.2
2019	1	18	5	59
2019	1	19	6	0
2019	1	20	7	0
2019	1	21	1	44.5
2019	1	22	2	37
2019	1	23	3	28
2019	1	24	4	102
2019	1	25	5	94
2019	1	26	6	0
2019	1	27	7	0
2019	1	28	1	101
2019	1	29	2	117
2019	1	30	3	120
2019	1	31	4	145
2019	2	1	5	129
2019	2	2	6	0
2019	2	3	7	0
2019	2	4	1	100
2019	2	5	2	96
2019	2	6	3	77
2019	2	7	4	114
2019	2	8	5	130
2019	2	9	6	0
2019	2	10	7	0
2019	2	11	1	126
2019	2	12	2	152
2019	2	13	3	150
2019	2	14	4	136
2019	2	15	5	152
2019	2	16	6	0
2019	2	17	7	0
2019	2	18	1	112
2019	2	19	2	157
2019	2	20	3	95
2019	2	21	4	106
2019	2	22	5	150
2019	2	23	6	0
2019	2	24	7	0
2019	2	25	1	120
2019	2	26	2	123
2019	2	27	3	140
2019	2	28	4	131
2019	3	1	5	141
2019	3	2	6	0
2019	3	3	7	0
2019	3	4	1	100
2019	3	5	2	119
2019	3	6	3	80
2019	3	7	4	64
2019	3	8	5	87
2019	3	9	6	0
2019	3	10	7	0
2019	3	11	1	80
2019	3	12	2	129
2019	3	13	3	96
2019	3	14	4	104
2019	3	15	5	110
2019	3	16	6	0
2019	3	17	7	0
2019	3	18	1	113
2019	3	19	2	100
2019	3	20	3	96
2019	3	21	4	115
2019	3	22	5	120
2019	3	23	6	0
2019	3	24	7	0
2019	3	25	1	104
2019	3	26	2	118
2019	3	27	3	128
2019	3	28	4	130
2019	3	29	5	128
2019	3	30	6	0
2019	3	31	7	0
2019	4	1	1	50
2019	4	2	2	49
2019	4	3	3	90
2019	4	4	4	97
2019	4	5	5	85
2019	4	6	6	0
2019	4	7	7	0
2019	4	8	1	80
2019	4	9	2	0
2019	4	10	3	0
2019	4	11	4	24
2019	4	12	5	45
2019	4	13	6	0
2019	4	14	7	0
2019	4	15	1	35
2019	4	16	2	50
2019	4	17	3	65
2019	4	18	4	47
2019	4	19	5	50
2019	4	20	6	0
2019	4	21	7	0
2019	4	22	1	49
2019	4	23	2	60
2019	4	24	3	53
2019	4	25	4	70
2019	4	26	5	70
2019	4	27	6	0
2019	4	28	7	0
2019	4	29	1	50
2019	4	30	2	52
2019	5	1	3	0
2019	5	2	4	68
2019	5	3	5	50
2019	5	4	6	0
2019	5	5	7	0
2019	5	6	1	49
2019	5	7	2	50
2019	5	8	3	52
2019	5	9	4	47
2019	5	10	5	41
2019	5	11	6	0
2019	5	12	7	0
2019	5	13	1	34
2019	5	14	2	43
2019	5	15	3	64
2019	5	16	4	62
2019	5	17	5	57
2019	5	18	6	0
2019	5	19	7	0
2019	5	20	1	53
2019	5	21	2	57
2019	5	22	3	59
2019	5	23	4	50
2019	5	24	5	42
2019	5	25	6	0
2019	5	26	7	0
2019	5	27	1	40
2019	5	28	2	0
2019	5	29	3	50
2019	5	30	4	51
2019	5	31	5	49
2019	6	1	6	0
2019	6	2	7	0
2019	6	3	1	42
2019	6	4	2	51
2019	6	5	3	40
2019	6	6	4	45
2019	6	7	5	50
2019	6	8	6	0
2019	6	9	7	0
2019	6	10	1	41
2019	6	11	2	30
2019	6	12	3	40
2019	6	13	4	29
2019	6	14	5	30
2019	6	15	6	0
2019	6	16	7	0
2019	6	17	1	42
2019	6	18	2	42
2019	6	19	3	72
2019	6	20	4	68
2019	6	21	5	65
2019	6	22	6	0
2019	6	23	7	0
2019	6	24	1	61
2019	6	25	2	67
2019	6	26	3	56
2019	6	27	4	60
2019	6	28	5	50
2019	6	29	6	0
2019	6	30	7	0
2019	7	1	1	43
2019	7	2	2	50
2019	7	3	3	44
2019	7	4	4	45
2019	7	5	5	40
2019	7	6	6	0
2019	7	7	7	0
2019	7	8	1	59
2019	7	9	2	60
2019	7	10	3	83
2019	7	11	4	75
2019	7	12	5	60
2019	7	13	6	0
2019	7	14	7	0
2019	7	15	1	56
2019	7	16	2	75
2019	7	17	3	80
2019	7	18	4	64
2019	7	19	5	77
2019	7	20	6	0
2019	7	21	7	0
2019	7	22	1	50
2019	7	23	2	45
2019	7	24	3	55
2019	7	25	4	48
2019	7	26	5	40
2019	7	27	6	0
2019	7	28	7	0
2019	7	29	1	45
2019	7	30	2	57
2019	7	31	3	60
2019	8	1	4	51
2019	8	2	5	48
2019	8	3	6	0
2019	8	4	7	0
2019	8	5	1	43
2019	8	6	2	63
2019	8	7	3	51
2019	8	8	4	56
2019	8	9	5	45
2019	8	10	6	0
2019	8	11	7	0
2019	8	12	1	42
2019	8	13	2	45
2019	8	14	3	45
2019	8	15	4	60
2019	8	16	5	55
2019	8	17	6	0
2019	8	18	7	0
2019	8	19	1	44
2019	8	20	2	39
2019	8	21	3	43
2019	8	22	4	42
2019	8	23	5	53
2019	8	24	6	0
2019	8	25	7	0
2019	8	26	1	47
2019	8	27	2	53
2019	8	28	3	61
2019	8	29	4	57
2019	8	30	5	59
2019	8	31	6	0
2019	9	1	7	0
2019	9	2	1	43
2019	9	3	2	54
2019	9	4	3	76
2019	9	5	4	55.9
2019	9	6	5	54
2019	9	7	6	0
2019	9	8	7	0
2019	9	9	1	63.47
2019	9	10	2	50
2019	9	11	3	54
2019	9	12	4	51
2019	9	13	5	48.9
2019	9	14	6	0
2019	9	15	7	0
2019	9	16	1	58.31
2019	9	17	2	77.91
2019	9	18	3	43.98
2019	9	19	4	56.2
2019	9	20	5	45.23
2019	9	21	6	0
2019	9	22	7	0
2019	9	23	1	72
2019	9	24	2	65
2019	9	25	3	72
2019	9	26	4	59
2019	9	27	5	70
2019	9	28	6	0
2019	9	29	7	0
2019	9	30	1	0
2019	10	1	2	59
2019	10	2	3	51
2019	10	3	4	64.4
2019	10	4	5	65
2019	10	5	6	0
2019	10	6	7	0
2019	10	7	1	48.5
2019	10	8	2	18.8
2019	10	9	3	57.3
2019	10	10	4	46.4
2019	10	11	5	47
2019	10	12	6	0
2019	10	13	7	0
2019	10	14	1	70
2019	10	15	2	66.1
2019	10	16	3	55.2
2019	10	17	4	76.4
2019	10	18	5	62
2019	10	19	6	0
2019	10	20	7	0
2019	10	21	1	49
2019	10	22	2	61.6
2019	10	23	3	59.8
2019	10	24	4	56
2019	10	25	5	60
2019	10	26	6	0
2019	10	27	7	0
2019	10	28	1	39.5
2019	10	29	2	30
2019	10	30	3	45
2019	10	31	4	70
2019	11	1	5	72.3
2019	11	2	6	0
2019	11	3	7	0
2019	11	4	1	83
2019	11	5	2	81
2019	11	6	3	61.2
2019	11	7	4	83
2019	11	8	5	70
2019	11	9	6	0
2019	11	10	7	0
2019	11	11	1	77.8
2019	11	12	2	87.3
2019	11	13	3	89.8
2019	11	14	4	88
2019	11	15	5	85
2019	11	16	6	0
2019	11	17	7	0
2019	11	18	1	79
2019	11	19	2	67.4
2019	11	20	3	73
2019	11	21	4	76.1
2019	11	22	5	63.3
2019	11	23	6	0
2019	11	24	7	0
2019	11	25	1	71.5
2019	11	26	2	83.5
2019	11	27	3	84
2019	11	28	4	76
2019	11	29	5	79.8
2019	11	30	6	0
2019	12	1	7	0
2019	12	2	1	0
2019	12	3	2	50.1
2019	12	4	3	70
2019	12	5	4	68
2019	12	6	5	72.5
2019	12	7	6	0
2019	12	8	7	0
2019	12	9	1	75
2019	12	10	2	80
2019	12	11	3	73.2
2019	12	12	4	74.8
2019	12	13	5	69.3
2019	12	14	6	0
2019	12	15	7	0
2019	12	16	1	71
2019	12	17	2	73
2019	12	18	3	66.9
2019	12	19	4	75
2019	12	20	5	73
2019	12	21	6	0
2019	12	22	7	0
2019	12	23	1	72
2019	12	24	2	77.1
2019	12	25	3	0
2019	12	26	4	0
2019	12	27	5	0
2019	12	28	6	0
2019	12	29	7	0
2019	12	30	1	36.1
2019	12	31	2	68
